# Supplementary figures and images for: 電子ジャーナル化とオープンアクセスの動向 (特集 電子ジャーナル化と科学コミュニティの変化)
Source: HighWire-hosted journal article supplement (doi:10.1136/bmjopen-2022-064700), 2010-09-01

Figure S1b

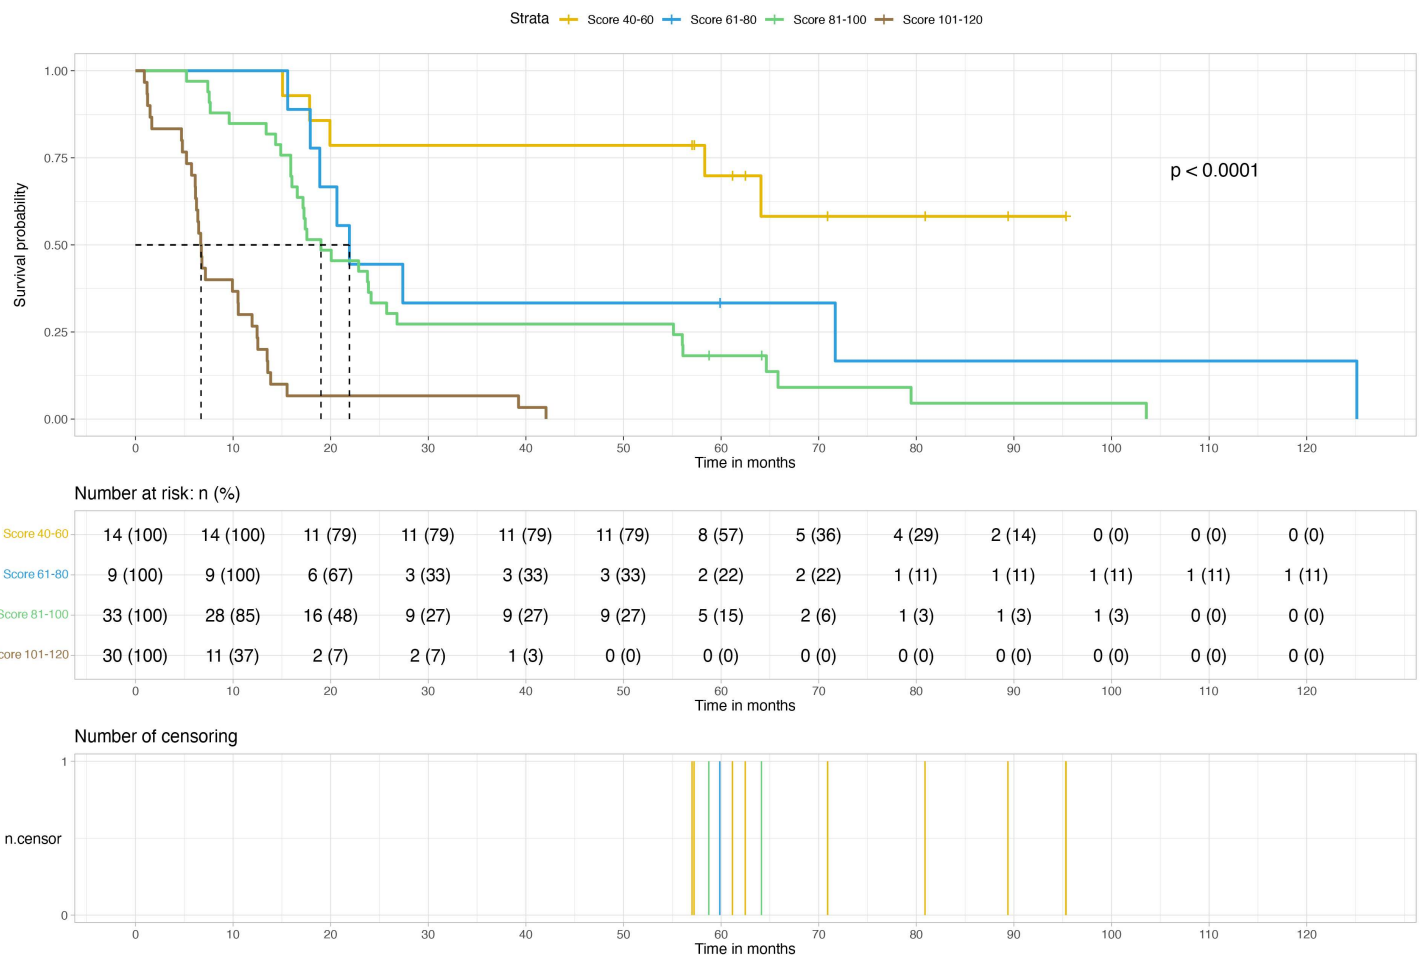

Supplement: bmjopen-2022-064700supp003_data_supplement.pdf [file bmjopen-2022-064700supp003_data_supplement.pdf]
